# Supplementary material
Source: publisher site journal article supplement (https://iopscience.iop.org/1748-9326/7/1/014019/media/erl410200suppdata.pdf)
Supplement: Supplementary file 1 [file erl410200suppdata.pdf]

ShieldSquare Error


# Something went wrong

An error has prevented the portal from working properly.

Please contact us.

You reached this page when trying to access
**MDI3MDQ5ZTAzYjcxLTcyNDgtZjNlNC03NDRiLWRhYzdkOTUy** from
**3.144.172.115** on
**April 25 2024, 06:00:46 UTC**
